# Supplementary material
Source: publisher site journal article supplement (https://www.dovepress.com/article/492300)
Supplement: Supplementary file 1 [file get_supplementary_file.php]

**Title Page**

**Treatment patterns and healthcare resource utilization by gender and migraine frequency in adult patients receiving galcanezumab versus standard of care preventive medications over 24 months: A United States retrospective claims study**

Oralee J. Varnadoa, Michelle Vub, Erin Buysmanb, Gilwan Kima, Gayle Allenbackb, Margaret Hoyta, Helen Trenzb, Feng Caob and Lars Viktrupa

*aEli Lilly and Company, Indianapolis, IN, USA; bOptum Life Sciences, HEOR, Eden Prairie, MN, USA*

**Correspondence:** Oralee J. Varnado, Value, Evidence, and Outcomes, Eli Lilly and Company, Lilly Corporate Center, 893 Delaware Street, Indianapolis, IN 46285, USA; Tel: +1 317‑277‑0599; Email: [varnado_oralee_johnson@lilly.com](mailto:varnado_oralee_johnson@lilly.com)

## Supplementary Table 1. Conventional preventive medications for migraine included in the SOC cohort by drug class and drug category.

| **Drug class/drug category** | **Conventional preventive treatments for migraine in SOC cohort** | | |
| --- | --- | --- | --- |
| **Established efficacy** | **Probably effective** | **Other** |
| Anticonvulsants | Divalproex sodium or sodium valproate (including valproic acid), topiramate |  |  |
| Beta-blockers | Metoprolol, propranolol, timolol | Atenolol, nadolol |  |
| Tricyclic antidepressants |  | Amitriptyline, venlafaxine |  |
| Nonspecific | OnabotulinumtoxinA |  |  |
| Angiotensin II receptor blockers | Candesartan |  |  |
| Calcium channel blockers |  |  | Verapamil |

Table modified from

1. Silberstein SD, Holland S, Freitag F, Dodick DW, Argoff C, Ashman E. Evidence-based guideline update: pharmacologic treatment for episodic migraine prevention in adults: report of the Quality Standards Subcommittee of the American Academy of Neurology and the American Headache Society. Neurology 2012 Apr 24;78(17):1337-45.
2. Ailani J, Burch RC, Robbins MS. The American Headache Society Consensus Statement: Update on integrating new migraine treatments into clinical practice. Headache 2021 Jul;61(7):1021-39
3. Varnado OJ, Manjelievskaia J, Ye W, Perry A, Schuh K, Wenzel R. Treatment Patterns for Calcitonin Gene-Related Peptide Monoclonal Antibodies Including Galcanezumab versus Conventional Preventive Treatments for Migraine: A Retrospective US Claims Study. Patient Prefer Adherence 2022;16:821-39.

Abbreviation. SOC, standard of care preventive migraine medications.

## Supplementary Table 2. Definitions and calculations of outcomes included in the study.

| **Outcomes** | **Definitions** |
| --- | --- |
| **Treatment adherence** | - Treatment adherence to the index drug was reported using the PDC. The PDC was calculated by dividing the number of days on which the index therapy was available (based on pharmacy and medical claims) by the number of days between the index date through the follow-up end date (PDC observation period). For patients with multiple SOC index drug classes, the numerator was the sum of days when either drug class was present. Patients with PDC ≥80% were considered treatment adherent. |
| **Persistence** | - Persistence to the index drug was defined as the number of days of continuous therapy from the index date until the end of the follow-up period, allowing for a maximum gap of <60 days (<60-day gap) between prescription fills. Persistence to the index drug until the end of follow-up and the number of days of persistent index drug use among all patients in the cohort were calculated. Persistence was measured in those with complete medication claims data for the full 24-month follow-up period. Patients were censored from the persistence analysis in cases where the gap between the end of the patient’s last prescription fill and the end of the follow‑up was <60 days and there was not sufficient information beyond the end of the follow-up period to determine if patients refilled. |
| **Discontinuation** | - Discontinuation of the index drug was defined as a minimum gap in therapy of 60 days. The date of discontinuation was defined by the date the patient had run out of the days’ supply of the last prescription filled before the first observed gap in therapy. For patients with multiple SOC index drug classes, discontinuation of either component class equated to discontinuation of the index therapy. Similar to the persistence calculation, discontinuation was not measured for patients who had a <60‑day gap between the end of their last prescription fill and the end of the follow-up in the main analysis; however, these patients were included as censored in the Kaplan‑Meier analysis. |
| **Restart of index drug after discontinuation** | - Restart of the index drug was evaluated among patients who discontinued the index drug (≥60-day gap). Restart was defined as the presence of a prescription filled for the index drug after the discontinuation date and no later than the end of the study period. The time to first restart was calculated as the days between the discontinuation date and the restart date of the index drug. |
| **Switch to non-index drug after discontinuation** | - Treatment switch was defined as the first switch to a non-index migraine preventive treatment after discontinuation that was not part of the index treatment regimen. The index treatment regimen comprised all migraine preventive medications with overlapping days’ supply within a ±30‑day period of the index date. Treatment switch could occur between individual calcitonin gene-related peptide monoclonal antibodies/gepants or between different SOC drug classes of migraine preventive treatment. Treatment switch between SOC drugs within the same drug class was not considered a switch. The time to first switch was calculated as the number of days between the index date and the first switch date to a drug that was not part of the index treatment regimen. Baseline and follow-up preventive and acute migraine medications analyzed were based on the 2012 guidelines published by the American Academy of Neurology and the 2021 American Headache Society consensus statement.1,2 |
| **HCRU and direct costs** | - All-cause and migraine-related HCRU included ambulatory visits (i.e. physician office and outpatient visits), ER visits, inpatient admissions, and other medical visits. In addition, migraine-related HCRU and direct costs included acute and preventive migraine medication counts/fills and costs, respectively. - All-cause and migraine-related healthcare costs were categorized as medical, pharmacy, and total costs. HCRU and costs were defined as migraine-related if a medical claim had an ICD-10-CM code for migraine in any position or a pharmacy claim was for a migraine treatment. All-cause or migraine-related total costs were the sum of healthcare costs incurred from pharmacy and medical costs. Medical costs were the sum of healthcare costs incurred from ambulatory visits (physician office and hospital outpatient), ER visits, inpatient visits, and other medical visits. Migraine-related pharmacy costs included both acute and preventive migraine medication costs. Change in all-cause and migraine-related HCRU and direct costs were reported as per patient per year and inflated to 2022 US dollars. |

Abbreviations. ER, emergency room; HCRU, healthcare resource utilization; ICD-10-CM, International Classification of Diseases, Tenth Revision, Clinical Modification; PDC, proportion of days covered; SOC, standard of care preventive migraine medications.

1. Silberstein SD, Holland S, Freitag F, Dodick DW, Argoff C, Ashman E. Evidence-based guideline update: pharmacologic treatment for episodic migraine prevention in adults: report of the Quality Standards Subcommittee of the American Academy of Neurology and the American Headache Society. Neurology 2012 Apr 24;78(17):1337-45.
2. Ailani J, Burch RC, Robbins MS. The American Headache Society Consensus Statement: Update on integrating new migraine treatments into clinical practice. Headache 2021 Jul;61(7):1021-39
